# Supplementary material for: Differences in Gene Expression Profile of Primary Tumors in Metastatic and Non-Metastatic Papillary Thyroid Carcinoma—Do They Exist?
Source: PubMed Central journal article supplement (PMC7369779; doi:10.3390/ijms21134629), 2020-06-29
Supplement: ijms-21-04629-s001.pdf [file ijms-21-04629-s001.pdf]

Table S1. List of 28 genes validated by qPCR. No significant gene was found (data not shown).

| Gene           | Full gene name                                                                              |
|----------------|---------------------------------------------------------------------------------------------|
| <i>ACACA</i>   | acetyl-Coenzyme A carboxylase alpha                                                         |
| <i>AMACR</i>   | alpha-methylacyl-CoA racemase                                                               |
| <i>ARHGEF2</i> | rho/rac guanine nucleotide exchange factor (GEF) 2                                          |
| <i>BLVRA</i>   | biliverdin reductase A                                                                      |
| <i>CASK</i>    | calcium/calmodulin-dependent serine protein kinase (MAGUK family)                           |
| <i>CCT5</i>    | chaperonin containing TCP1, subunit 5 (epsilon)                                             |
| <i>CDC2</i>    | cell division cycle 2, G1 to S and G2 to M                                                  |
| <i>CIB1</i>    | calcium and integrin binding 1 (calmyrin)                                                   |
| <i>CRELD2</i>  | homo sapiens cysteine rich with EGF like domains 2                                          |
| <i>GALNT10</i> | UDP-N-acetyl-alpha-D-galactosamine:polypeptide N-acetylgalactosaminyltransferase 10         |
| <i>GUSB</i>    | glucuronidase, beta                                                                         |
| <i>HMMR</i>    | hyaluronan-mediated motility receptor                                                       |
| <i>IGFBP3</i>  | insulin-like growth factor binding protein 3                                                |
| <i>ITPR3</i>   | inositol 1,4,5-triphosphate receptor, type 3                                                |
| <i>KLK10</i>   | kallikrein-related peptidase 10                                                             |
| <i>KPNA6</i>   | karyopherin alpha 6 (importin alpha 7)                                                      |
| <i>LAMP1</i>   | lysosomal-associated membrane protein 1                                                     |
| <i>P4HB</i>    | procollagen-proline, 2-oxoglutarate 4-dioxygenase (proline 4-hydroxylase), beta polypeptide |
| <i>PARP8</i>   | poly (ADP-ribose) polymerase family, member 8                                               |
| <i>PLCH1</i>   | phospholipase C, eta 1                                                                      |
| <i>RPN2</i>    | ribophorin II                                                                               |
| <i>SERTAD2</i> | SERTA domain containing 2                                                                   |
| <i>SLC2A8</i>  | solute carrier family 2, (facilitated glucose transporter) member 8                         |
| <i>SMOX</i>    | spermine oxidase                                                                            |
| <i>SNCA</i>    | synuclein, alpha (non A4 component of amyloid precursor)                                    |
| <i>SRI</i>     | Sorcin                                                                                      |
| <i>TRPS1</i>   | trichorhinophalangeal syndrome I                                                            |
| <i>TXNRD3</i>  | thioredoxin reductase 3                                                                     |

Table S2. Clinical characteristic of the qPCR group. .

|                                                                        | All QPCR patients     | M1 patients           | M0 patients           | <i>p</i> -value |
|------------------------------------------------------------------------|-----------------------|-----------------------|-----------------------|-----------------|
| Patients number                                                        | 63                    | 9                     | 54                    |                 |
| Median age at diagnosis [years]<br>(range)                             | 50<br>(12-75)         | 29<br>(12-66)         | 53<br>(12-75)         | 0.091           |
| Median follow-up [months]<br>(range)                                   | 148.3<br>(18.0-238.4) | 135.1<br>(40.6-238.4) | 148.9<br>(18.0-184.0) | 0.875           |
| Sex:                                                                   |                       |                       |                       |                 |
| - male                                                                 | 14 (22.2%)            | 5 (55.6%)             | 9 (16.7%)             | 0.020           |
| - female                                                               | 49 (77.8%)            | 4 (44.4%)             | 45 (83.3%)            |                 |
| PTC histological subtype                                               |                       |                       |                       |                 |
| - classic                                                              | 51 (81.0%)            | 6 (66.7%)             | 45 (83.3%)            | 0.158           |
| - follicular                                                           | 9 (14.3%)             | 3 (33.3%)             | 6 (11.1%)             |                 |
| - other                                                                | 3 (4.8%)              | 0 (0%)                | 3 (5.6%)              |                 |
| T feature (primary tumor):                                             |                       |                       |                       |                 |
| - T1                                                                   | 39 (61.9%)            | 1 (11.1%)             | 38 (70.4%)            | < 0.001         |
| - T2                                                                   | 11 (17.5%)            | 2 (22.2%)             | 9 (16.7%)             |                 |
| - T3                                                                   | 8 (12.7%)             | 2 (22.2%)             | 6 (11.1%)             |                 |
| - T4                                                                   | 3 (4.8%)              | 2 (22.2%)             | 1 (1.9%)              |                 |
| - Tx                                                                   | 2 (3.2%)              | 2 (22.2%)             | 0 (0%)                |                 |
| Lymph node metastases:                                                 |                       |                       |                       |                 |
| - central neck compartment and<br>upper mediastinum (N1a)              | 24 (38.1%)            | 7 (77.8%)             | 17 (31.5%)            | 0.003           |
| - lateral neck compartment and<br>retropharyngeal lymph nodes<br>(N1b) | 21 (33.3%)            | 7 (77.8%)             | 14 (25.9%)            | 0.001           |
| Recurrence after primary<br>treatment                                  | 6 (9.5%)              | 1 (11.1%)             | 5 (9.3%)              | > 0.999         |
| PTC-related death                                                      | 3 (4.8%)              | 3 (33.3%)             | 0 (0%)                | 0.002           |

The patients were staged according to the 8<sup>th</sup> UICC/AJCC TNM Edition (2016). PTC – papillary thyroid cancer; M1 – distant metastases present; M0 - distant metastases absent

Table S3. List of primers used in qPCR.

| Gene           | Primers sequence (5'-3') |                           | Lenght (bp) |
|----------------|--------------------------|---------------------------|-------------|
| <i>ACACA</i>   | F                        | gatgtggatgatgggctaca      | 63          |
|                | R                        | tgaggccttgatcattactgg     |             |
| <i>AMACR</i>   | F                        | tagtgctggacctgaagcag      | 112         |
|                | R                        | agctggagtttctccatgaca     |             |
| <i>ARHGEF2</i> | F                        | gtgctatgcctgtaacaagagc    | 72          |
|                | R                        | tggatagtcacattgcaggtg     |             |
| <i>BLVRA</i>   | F                        | aggtcgctatatctgcagtg      | 71          |
|                | R                        | cttgccagcattaaggaactg     |             |
| <i>CASK</i>    | F                        | caattaggggagtctggactg     | 63          |
|                | R                        | tggtgccataaaatgaggtg      |             |
| <i>CCT5</i>    | F                        | attggagatggaaccacagg      | 66          |
|                | R                        | caattgctccgcttctctaa      |             |
| <i>CDC2</i>    | F                        | tggatctgaagaaacttgattcta  | 96          |
|                | R                        | caatccctgtaggatttg        |             |
| <i>CIB1</i>    | F                        | acaggcggtttgtgagc         | 123         |
|                | R                        | gctcctgaaggggttg          |             |
| <i>CRELD2</i>  | F                        | gcttcgaaggaaacggaagat     | 72          |
|                | R                        | gtgtcgggcttctcctct        |             |
| <i>GALNT10</i> | F                        | ggaagtatgtgcctacaaggt     | 64          |
|                | R                        | gccaccgcttaaggttc         |             |
| <i>GUSB</i>    | F                        | cgccctgcctatctgtattc      | 91          |
|                | R                        | tccccacaggagtgtag         |             |
| <i>HMMR</i>    | F                        | cgattcaatgaccttctgg       | 85          |
|                | R                        | aggatactggtccttcaatacttct |             |
| <i>IGFBP3</i>  | F                        | aacgctagtgccgtcagc        | 86          |
|                | R                        | cggcttctccgactcac         |             |
| <i>ITPR3</i>   | F                        | tgtgctggacacatcaac        | 94          |
|                | R                        | cagcagctgcaccacaac        |             |
| <i>KLK10</i>   | F                        | ttccctaccgctgtgctc        | 95          |
|                | R                        | ggtcaggcccttgtgtact       |             |
| <i>KPNA6</i>   | F                        | tcagactttgaggatgttcagg    | 73          |
|                | R                        | ggcaaacagagctatctccag     |             |
| <i>LAMP1</i>   | F                        | gtgggtccaggcttcaa         | 78          |
|                | R                        | agcatgctgttctcgcca        |             |
| <i>P4HB</i>    | F                        | gcttcccccaaggaatataca     | 61          |
|                | R                        | tcttcagccagttcacgatg      |             |
| <i>PARP8</i>   | F                        | agggtttgaaaagcaaacaca     | 71          |

| Gene           | Primers sequence (5'-3') |                          | Lenght (bp) |
|----------------|--------------------------|--------------------------|-------------|
| <i>PLCH1</i>   | R                        | agggttgaaaagcaaacaca     | 74          |
|                | F                        | aactgtggaagaactggctca    |             |
|                | R                        | caagacaatagtcggtgtcacat  |             |
| <i>RPN2</i>    | F                        | ggcagtgtgacgtttctgg      | 76          |
|                | R                        | tctggaactaatgtgctgttctct |             |
| <i>SERTAD2</i> | F                        | ccctcctgatgcggttagttc    | 66          |
|                | R                        | cgtttctcctttaccaac       |             |
| <i>SLC2A8</i>  | F                        | ggcctttctcgtgaccaa       | 71          |
|                | R                        | caagccagaaggctccatag     |             |
| <i>SMOX</i>    | F                        | gatgctgcgtcagttcacag     | 95          |
|                | R                        | aggagccgcggaagtaag       |             |
| <i>SNCA</i>    | F                        | caaacaggggtgtggcaga      | 72          |
|                | R                        | tccttggtttggagcctac      |             |
| <i>SRI</i>     | F                        | aaagatcaccttcgacgactaca  | 86          |
|                | R                        | gctgagcagtatcccgtctt     |             |
| <i>TRPS1</i>   | F                        | cggtggcctctaccagaag      | 109         |
|                | R                        | gggtaaggcgctttcttg       |             |
| <i>TXNRD3</i>  | F                        | aaggaaattggctgggaat      | 74          |
|                | R                        | ggttctgaatcgctttgtca     |             |
